# Supplementary material for: Molecular and electronic structure of chromium(v) nitrido complexes with azide and isothiocyanate ligands
Source: Royal Society of Chemistry journal article supplement (doi:10.1039/b505138j), 2005-01-01
Supplement: b505138j.pdf [file b505138j.pdf]

**Synthesis of (Me<sub>4</sub>N)<sub>2</sub>[Cr(N)(NCS)<sub>4</sub>]**

Tetramethylammoniumhydroxide in methanol (25% w/w, Sigma) and ammoniumthiocyanate (Riedel-de Haën) were used as received. Solvents: diethyl ether (Lab-Scan), acetonitrile (Lab-Scan), dichloromethane (Lab-Scan) and methanol (Lab-Scan) were HPLC grade and were used without purification.

**Synthesis of tetramethylammoniumthiocyanate.** To a stirred solution of ammoniumthiocyanate (11.513g; 0.15mol) in water (50ml), was added tetramethylammoniumhydroxide (55.1g; 0.15mol) in methanol with precipitation of a white product commencing immediately. This was redissolved by heating and addition of methanol. Slow cooling yielded white needle shaped crystal. Yield: 12.68g (63.9%)

**Synthesis of tetramethylammoniumnitridotetrakis(isothiocyanato)chromate(V) by nitrogen atom transfer.**

This salt can be synthesized without isolating  $[\text{Cr}(\text{N})\text{Cl}_4]^{2-}$ : The following procedure (cf. T. Birk, J. Bendix *Inorg. Chem.* **2003**, 42, 7608) was used for preparing a solution containing  $\{\text{Cr}\equiv\text{N}\}^{2+}$  complexed by labile auxiliary ligands:  $\text{CrCl}_3(\text{THF})_3$  (0.906 g; 2.42 mmol) was dissolved in acetonitrile (20 ml) to give a purple solution. Addition of solid  $\text{Mn}(\text{N})(\text{salen})$  (0.810 g; 2.42 mmol) was accompanied by an immediate color change to yield a dark brown solution with suspended solid material. The reaction mixture was stirred for 30 min. under a  $\text{N}_2$  atmosphere and filtered to give a dark brown crystalline precipitate and a yellow-brown solution. To the filtrate, a solution of  $(\text{Me}_4\text{N})\text{NCS}$  (2.560g; 19.36mmol) dissolved in methanol (10ml) was added rapidly. After 2 min. diethylether (100ml) was added to the solution causing immediate precipitation of a yellow-green product. After filtration and washing with diethylether (avoiding drying of the product), the product was extracted with acetonitrile (40ml). Dichloromethane (500ml) was added to the extract, and the resulting solution was left for crystallisation. Yield: 0.360g (33.3%) of green crystals. Anal. Calcd for  $\text{C}_{12}\text{H}_{24}\text{N}_7\text{S}_4\text{Cr}$ : C, 32.27; H, 5.42; N, 21.95. Found: C, 31.37; H, 5.27; N, 20.99.

## IR spectra

Nitrido complexes:

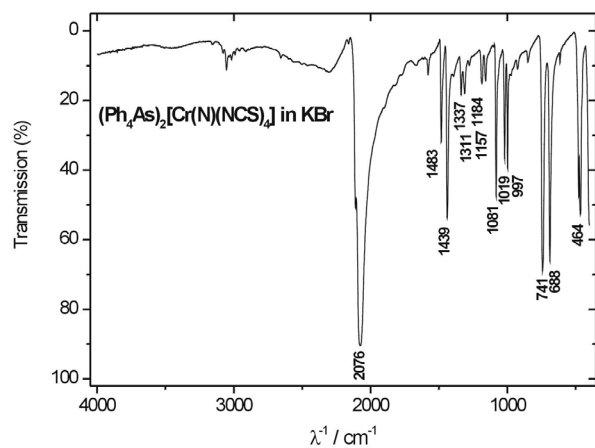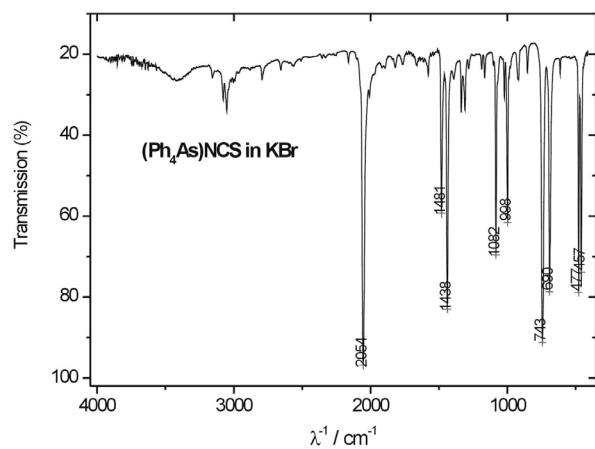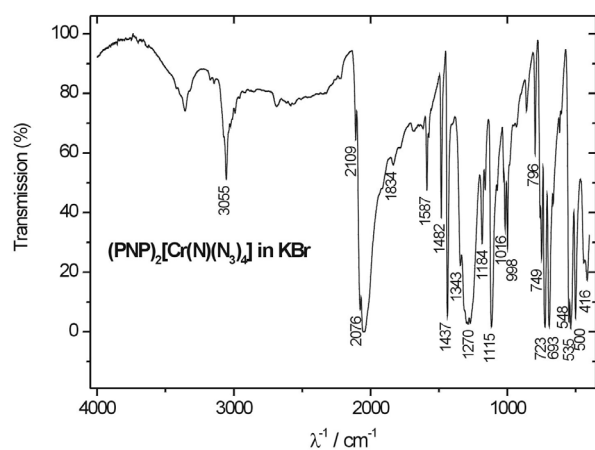

Reference spectra:

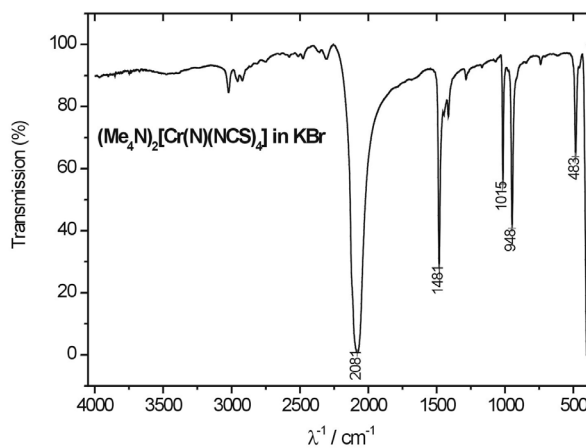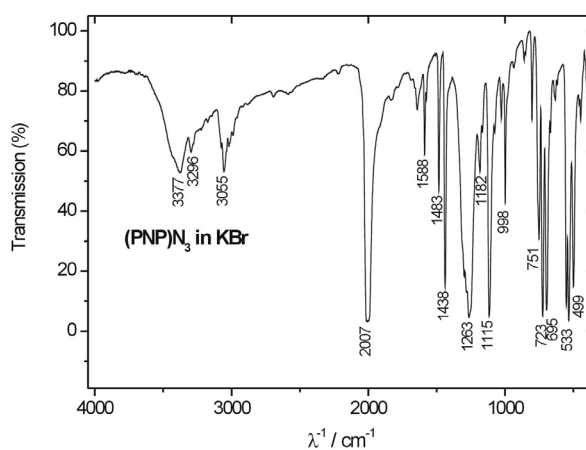

## Mass spectrometric data

1:

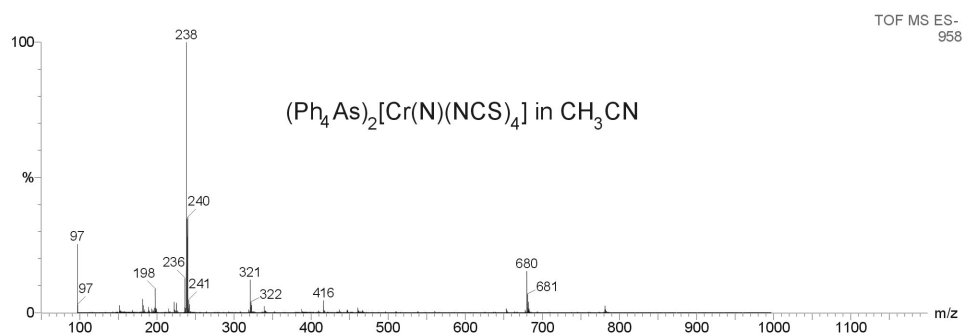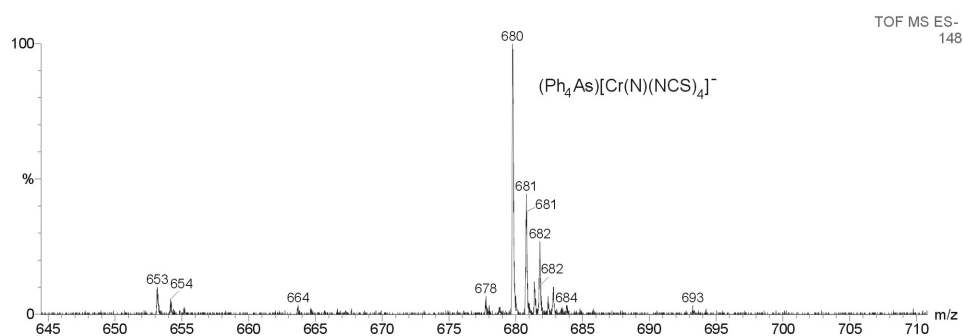

2:

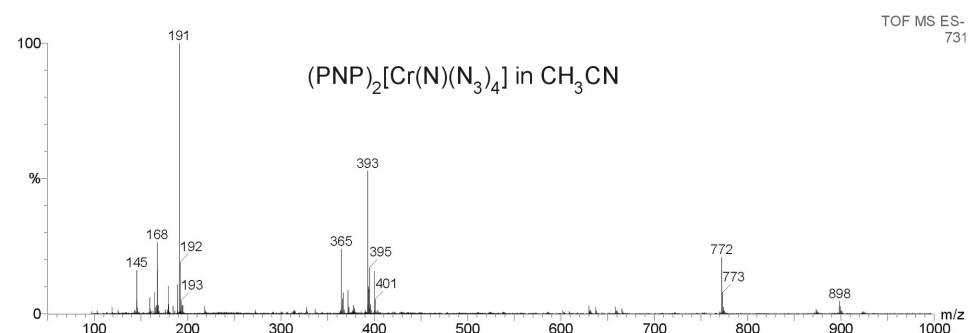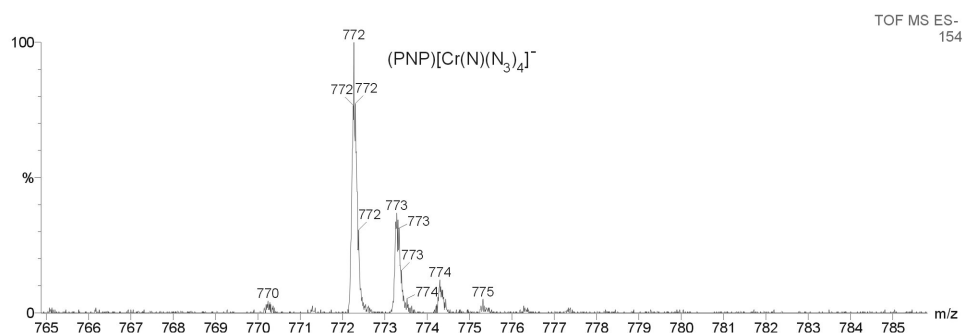

## Low temperature EPR spectrum of 2

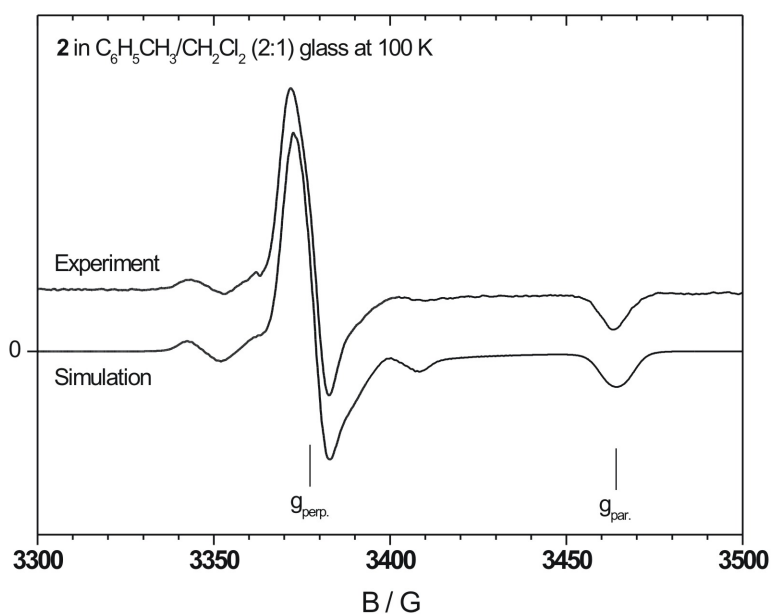**Simulation parameters:**

$$g_{\perp} = 1.9895, g_{\parallel} = 1.9385, A_{\perp}^{\text{Cr}} = 17.5 \cdot 10^{-4} \text{ cm}^{-1},$$
$$A_{\perp}^{\text{N(nitrido)}} = 2.90 \cdot 10^{-4} \text{ cm}^{-1}, A_{\parallel}^{\text{N(nitrido)}} = 2.0 \cdot 10^{-4} \text{ cm}^{-1},$$
$$A^{\text{N(azido)}} = 1.20 \cdot 10^{-4} \text{ cm}^{-1}, \text{ line width (FWHH)} = 1.5 \text{ G.}$$

Simulation software: SIM & ASIM, H. Weihe Univ. of Copenhagen (1992-2004); C. J. H. Jacobsen; E. Pedersen; J. Villadsen; H. Weihe *Inorg. Chem.* 1993, **32**, 1216.

## Some input and results from DFT calculations:

DFT calculations were performed with the Amsterdam Density Functional (ADF) program suite version 2002.03.<sup>i,ii,iii</sup> Slater-type orbital basis sets of triple- $\zeta$  quality for the valence orbitals were employed with polarization functions on the ligand atoms and additional valence p orbitals on Cr (ADF basis set TZ2P). Calculations were all-electron calculations with no frozen cores. The GGA calculations employed the exchange functional proposed by Becke (B88)<sup>iv</sup> and the correlation functional due to Perdew (P86)<sup>v</sup>. No use of symmetry was made. All charge and spin densities were based on Mulliken analyses.<sup>vi</sup> Transition energies were evaluated by Slater's transition state method.<sup>vii</sup>

- 
- (<sup>i</sup>) ADF 2.3.0, Theoretical Chemistry, Vrije Universiteit, Amsterdam  
(<sup>ii</sup>) Baerends, E. J. et al. *Chem. Phys.* **1973**, *2*, 41.  
(<sup>iii</sup>) te Velde, G.; Baerends, E. J. *J. Comp. Phys.* **1992**, *99*, 84.  
(<sup>iv</sup>) Becke, A. D. *Phys. Rev.* **1988**, *A38*, 3098.  
(<sup>v</sup>) Perdew, J. P. *Phys. Rev.* **1986**, *B33*, 8822; Perdew, J. P. *Phys. Rev.* **1987**, *B34*, 7406 (erratum).  
(<sup>vi</sup>) Mulliken, R. S. *J. Chem. Phys.* **1955**, *23*, 1833.  
(<sup>vii</sup>) Slater, J.C. *Quantum Theory of Molecules and Solids* McGraw-Hill, NY, **1974**
- 

**Input:**

```
title [Cr(N)(NCS)4]2- all electron geometry opt
```

```
atoms cartesian
  N      0.12894      -0.00001      -2.01380
  Cr     0.02445       0.00000      -0.47213
  N     -1.92198       0.00010      -0.18292
  N      0.00070       1.92889      -0.01355
  N      0.00051      -1.92889      -0.01355
  C     -3.05395       0.00015       0.08742
  N      1.93757      -0.00010       0.06170
  C      3.09572      -0.00015       0.19879
  C     -0.04459      -3.06625       0.22020
  C     -0.04429       3.06625       0.22020
  S      4.70574      -0.00023       0.38561
  S     -4.62022       0.00023       0.48375
  S     -0.10454      -4.66278       0.51914
  S     -0.10407       4.66279       0.51914
end
```

```
charge -2 1
```

```
unrestricted
```

```
symmetry NOSYM
```

```
BASIS
```

```
  TYPE TZ2P
```

```
  CORE NONE
```

```
END
```

```
xc
```

```
  LDA vwn
```

```
  GGA becke perdew
```

```

end

geometry
end

noprnt Computation
noprnt Scf
print OrbPop

EPRINT
SFO NOEIG, NOOVL
ORBPOPER -10 1
SUBEND
END

end input

```

**Output (partial):**

Coordinates (Cartesian)

| Atom | bohr      |           |           | angstrom  |           |           | Geometric Variables   |    |    |
|------|-----------|-----------|-----------|-----------|-----------|-----------|-----------------------|----|----|
|      | X         | Y         | Z         | X         | Y         | Z         | (0:frozen, *:LT par.) |    |    |
| 1 N  | 0.055171  | -0.000213 | -3.853271 | 0.029195  | -0.000113 | -2.039063 | 1                     | 2  | 3  |
| 2 Cr | 0.020041  | -0.000066 | -0.954385 | 0.010605  | -0.000035 | -0.505038 | 4                     | 5  | 6  |
| 3 N  | -3.644858 | 0.000420  | -0.145448 | -1.928775 | 0.000222  | -0.076968 | 7                     | 8  | 9  |
| 4 N  | -0.000796 | 3.642142  | -0.065751 | -0.000421 | 1.927338  | -0.034794 | 10                    | 11 | 12 |
| 5 N  | -0.001706 | -3.642185 | -0.066030 | -0.000903 | -1.927361 | -0.034941 | 13                    | 14 | 15 |
| 6 C  | -5.849511 | 0.000478  | 0.230437  | -3.095427 | 0.000253  | 0.121942  | 16                    | 17 | 18 |
| 7 N  | 3.662964  | -0.000611 | -0.063833 | 1.938357  | -0.000323 | -0.033779 | 19                    | 20 | 21 |
| 8 C  | 5.874112  | -0.000484 | 0.272552  | 3.108445  | -0.000256 | 0.144228  | 22                    | 23 | 24 |
| 9 C  | -0.034079 | -5.821078 | 0.436657  | -0.018034 | -3.080381 | 0.231069  | 25                    | 26 | 27 |
| 10 C | -0.033210 | 5.821145  | 0.436393  | -0.017574 | 3.080416  | 0.230929  | 28                    | 29 | 30 |
| 11 S | 8.918265  | -0.000231 | 0.749505  | 4.719341  | -0.000122 | 0.396621  | 31                    | 32 | 33 |
| 12 S | -8.885932 | 0.000492  | 0.760263  | -4.702232 | 0.000260  | 0.402314  | 34                    | 35 | 36 |
| 13 S | -0.075451 | -8.825336 | 1.121176  | -0.039927 | -4.670165 | 0.593301  | 37                    | 38 | 39 |
| 14 S | -0.074826 | 8.825366  | 1.121247  | -0.039596 | 4.670181  | 0.593338  | 40                    | 41 | 42 |

## MULLIKEN POPULATIONS

The survey below gives for each atom:

- the total charge (Z minus electrons)
- the net spin polarization (nr of electrons spin-A minus spin-B)
- for each spin the atomic electron valence density (integrated) per L-value.

| Atom | Charge  | Spin density | S                      | P                | D                | F                |
|------|---------|--------------|------------------------|------------------|------------------|------------------|
| 1 N  | -0.2985 | -0.2409      | A: 1.9312<br>B: 1.9358 | 1.5770<br>1.8155 | 0.0181<br>0.0162 | 0.0025<br>0.0021 |
| 2 Cr | 0.8663  | 1.1072       | A: 3.0834<br>B: 3.0470 | 6.2171<br>6.1859 | 2.7970<br>1.7567 | 0.0229<br>0.0237 |
| 3 N  | -0.2780 | -0.0248      | A: 1.7813<br>B: 1.7870 | 1.8190<br>1.8413 | 0.0235<br>0.0202 | 0.0029<br>0.0028 |
| 4 N  | -0.2774 | -0.0251      | A: 1.7812<br>B: 1.7870 | 1.8186<br>1.8413 | 0.0235<br>0.0202 | 0.0029<br>0.0028 |
| 5 N  | -0.2777 | -0.0251      | A: 1.7813<br>B: 1.7870 | 1.8187<br>1.8414 | 0.0235<br>0.0202 | 0.0029<br>0.0028 |
| 6 C  | 0.0604  | 0.0210       | A: 1.5805<br>B: 1.5805 | 1.3501<br>1.3293 | 0.0455<br>0.0452 | 0.0043<br>0.0043 |
| 7 N  | -0.2793 | -0.0250      | A: 1.7819<br>B: 1.7876 | 1.8189<br>1.8415 | 0.0235<br>0.0202 | 0.0029<br>0.0028 |
| 8 C  | 0.0613  | 0.0216       | A: 1.5803<br>B: 1.5802 | 1.3502<br>1.3288 | 0.0455<br>0.0452 | 0.0043<br>0.0043 |

|      |         |        |    |        |        |        |        |
|------|---------|--------|----|--------|--------|--------|--------|
| 9 C  | 0.0589  | 0.0215 | A: | 1.5809 | 1.3506 | 0.0455 | 0.0043 |
|      |         |        | B: | 1.5809 | 1.3294 | 0.0452 | 0.0043 |
| 10 C | 0.0586  | 0.0215 | A: | 1.5810 | 1.3507 | 0.0455 | 0.0043 |
|      |         |        | B: | 1.5810 | 1.3295 | 0.0452 | 0.0043 |
| 11 S | -0.4237 | 0.0370 | A: | 2.9275 | 5.2555 | 0.0402 | 0.0072 |
|      |         |        | B: | 2.9268 | 5.2194 | 0.0397 | 0.0073 |
| 12 S | -0.4244 | 0.0368 | A: | 2.9276 | 5.2558 | 0.0401 | 0.0072 |
|      |         |        | B: | 2.9269 | 5.2198 | 0.0397 | 0.0073 |
| 13 S | -0.4232 | 0.0371 | A: | 2.9275 | 5.2554 | 0.0401 | 0.0072 |
|      |         |        | B: | 2.9268 | 5.2192 | 0.0397 | 0.0073 |
| 14 S | -0.4232 | 0.0371 | A: | 2.9274 | 5.2554 | 0.0401 | 0.0072 |
|      |         |        | B: | 2.9268 | 5.2192 | 0.0397 | 0.0073 |

\*\*\* SPIN 1 \*\*\*

| E (eV) | Occ  | MO   | %      | SFO (first member) | E (eV) | Occ  | Fragment |
|--------|------|------|--------|--------------------|--------|------|----------|
| 0.012  | 1.00 | 71 A | 21.51% | 2 P:z              | -7.116 | 1.33 | 11 S     |
|        |      |      | 17.31% | 2 P:z              | -7.116 | 1.33 | 14 S     |
|        |      |      | 17.31% | 2 P:z              | -7.116 | 1.33 | 13 S     |
|        |      |      | 14.14% | 2 P:z              | -7.116 | 1.33 | 12 S     |
|        |      |      | 7.29%  | 1 P:z              | -7.213 | 1.00 | 5 N      |
|        |      |      | 5.80%  | 1 P:z              | -7.213 | 1.00 | 3 N      |
|        |      |      | 5.80%  | 1 P:z              | -7.213 | 1.00 | 4 N      |
|        |      |      | 4.74%  | 1 P:z              | -7.213 | 1.00 | 2 N      |
| 0.099  | 1.00 | 72 A | 27.57% | 2 P:z              | -7.116 | 1.33 | 14 S     |
|        |      |      | 27.57% | 2 P:z              | -7.116 | 1.33 | 13 S     |
|        |      |      | 9.46%  | 1 P:z              | -7.213 | 1.00 | 3 N      |
|        |      |      | 9.46%  | 1 P:z              | -7.213 | 1.00 | 4 N      |
|        |      |      | 5.50%  | 1 P:y              | -7.213 | 1.00 | 1 N      |
|        |      |      | 5.44%  | 2 P:y              | -7.116 | 1.33 | 11 S     |
|        |      |      | 4.17%  | 2 P:y              | -7.116 | 1.33 | 12 S     |
|        |      |      | 1.95%  | 1 P:y              | -7.213 | 1.00 | 5 N      |
|        |      |      | 1.49%  | 1 P:y              | -7.213 | 1.00 | 2 N      |
|        |      |      | 1.35%  | 1 D:yz             | -2.737 | 1.00 | 6 Cr     |
|        |      |      | 1.27%  | 2 P:y              | -7.116 | 1.33 | 14 S     |
|        |      |      | 1.27%  | 2 P:y              | -7.116 | 1.33 | 13 S     |
| 0.104  | 1.00 | 73 A | 33.62% | 2 P:z              | -7.116 | 1.33 | 12 S     |
|        |      |      | 24.92% | 2 P:z              | -7.116 | 1.33 | 11 S     |
|        |      |      | 11.68% | 1 P:z              | -7.213 | 1.00 | 2 N      |
|        |      |      | 8.72%  | 1 P:z              | -7.213 | 1.00 | 5 N      |
|        |      |      | 5.40%  | 1 P:x              | -7.213 | 1.00 | 1 N      |
|        |      |      | 3.55%  | 2 P:x              | -7.116 | 1.33 | 13 S     |
|        |      |      | 3.55%  | 2 P:x              | -7.116 | 1.33 | 14 S     |
|        |      |      | 1.48%  | 1 D:xz             | -2.737 | 1.00 | 6 Cr     |
|        |      |      | 1.29%  | 1 P:x              | -7.213 | 1.00 | 4 N      |
|        |      |      | 1.29%  | 1 P:x              | -7.213 | 1.00 | 3 N      |
| 0.207  | 1.00 | 74 A | 20.07% | 2 P:y              | -7.116 | 1.33 | 12 S     |
|        |      |      | 17.87% | 2 P:x              | -7.116 | 1.33 | 14 S     |
|        |      |      | 17.86% | 2 P:x              | -7.116 | 1.33 | 13 S     |
|        |      |      | 15.76% | 2 P:y              | -7.116 | 1.33 | 11 S     |
|        |      |      | 7.30%  | 1 P:y              | -7.213 | 1.00 | 2 N      |
|        |      |      | 6.52%  | 1 P:x              | -7.213 | 1.00 | 3 N      |
|        |      |      | 6.52%  | 1 P:x              | -7.213 | 1.00 | 4 N      |
|        |      |      | 5.75%  | 1 P:y              | -7.213 | 1.00 | 5 N      |
| 0.809  | 1.00 | 75 A | 48.98% | 1 D:xy             | -2.737 | 1.00 | 6 Cr     |
|        |      |      | 8.17%  | 2 P:y              | -7.116 | 1.33 | 12 S     |
|        |      |      | 8.15%  | 2 P:y              | -7.116 | 1.33 | 11 S     |
|        |      |      | 8.08%  | 2 P:x              | -7.116 | 1.33 | 13 S     |
|        |      |      | 8.07%  | 2 P:x              | -7.116 | 1.33 | 14 S     |
|        |      |      | 2.79%  | 2 D:xy             | 11.078 | 0.00 | 6 Cr     |
|        |      |      | 2.48%  | 1 P:y              | -7.213 | 1.00 | 2 N      |
|        |      |      | 2.48%  | 1 P:y              | -7.213 | 1.00 | 5 N      |
|        |      |      | 2.43%  | 1 P:x              | -7.213 | 1.00 | 4 N      |

|       |      |      |        |           |         |      |      |
|-------|------|------|--------|-----------|---------|------|------|
|       |      |      | 2.43%  | 1 P:x     | -7.213  | 1.00 | 3 N  |
|       |      |      | 1.22%  | 1 P:y     | -5.392  | 0.67 | 8 C  |
|       |      |      | 1.19%  | 1 P:x     | -5.392  | 0.67 | 9 C  |
|       |      |      | 1.19%  | 1 P:x     | -5.392  | 0.67 | 10 C |
|       |      |      | 1.17%  | 1 P:y     | -5.392  | 0.67 | 7 C  |
| 3.500 | 0.00 | 76 A | 46.39% | 1 P:x     | -7.213  | 1.00 | 1 N  |
|       |      |      | 40.85% | 1 D:xz    | -2.737  | 1.00 | 6 Cr |
|       |      |      | 3.71%  | 2 D:xz    | 11.078  | 0.00 | 6 Cr |
|       |      |      | 1.39%  | 1 P:z     | -5.392  | 0.67 | 8 C  |
|       |      |      | 1.35%  | 1 P:z     | -5.392  | 0.67 | 7 C  |
|       |      |      | 1.25%  | 2 S       | -18.690 | 2.00 | 2 N  |
| 3.505 | 0.00 | 77 A | 46.31% | 1 P:y     | -7.213  | 1.00 | 1 N  |
|       |      |      | 40.77% | 1 D:yz    | -2.737  | 1.00 | 6 Cr |
|       |      |      | 3.75%  | 2 D:yz    | 11.078  | 0.00 | 6 Cr |
|       |      |      | 1.60%  | 1 P:z     | -5.392  | 0.67 | 9 C  |
|       |      |      | 1.59%  | 1 P:z     | -5.392  | 0.67 | 10 C |
|       |      |      | 1.04%  | 2 S       | -18.690 | 2.00 | 4 N  |
|       |      |      | 1.03%  | 2 S       | -18.690 | 2.00 | 3 N  |
| 3.573 | 0.00 | 78 A | 60.68% | 1 D:x2-y2 | -2.737  | 1.00 | 6 Cr |
|       |      |      | 8.29%  | 2 D:x2-y2 | 11.078  | 0.00 | 6 Cr |
|       |      |      | 3.36%  | 2 S       | -18.690 | 2.00 | 5 N  |
|       |      |      | 3.10%  | 2 S       | -18.690 | 2.00 | 3 N  |
|       |      |      | 3.10%  | 2 S       | -18.690 | 2.00 | 4 N  |
|       |      |      | 2.94%  | 2 S       | -18.690 | 2.00 | 2 N  |
|       |      |      | 2.10%  | 1 P:x     | -7.213  | 1.00 | 5 N  |
|       |      |      | 1.84%  | 1 P:y     | -7.213  | 1.00 | 3 N  |
|       |      |      | 1.84%  | 1 P:y     | -7.213  | 1.00 | 4 N  |
|       |      |      | 1.81%  | 1 P:x     | -7.213  | 1.00 | 2 N  |
| 3.905 | 0.00 | 79 A | 22.83% | 1 P:z     | -7.213  | 1.00 | 1 N  |
|       |      |      | 19.15% | 1 D:z2    | -2.737  | 1.00 | 6 Cr |
|       |      |      | 9.70%  | 3 P:z     | -0.116  | 0.00 | 6 Cr |
|       |      |      | 6.38%  | 1 P:z     | -5.392  | 0.67 | 8 C  |
|       |      |      | 5.98%  | 1 P:z     | -5.392  | 0.67 | 10 C |
|       |      |      | 5.98%  | 1 P:z     | -5.392  | 0.67 | 9 C  |
|       |      |      | 5.90%  | 1 P:z     | -5.392  | 0.67 | 7 C  |
|       |      |      | 3.02%  | 2 P:z     | -7.116  | 1.33 | 11 S |
|       |      |      | 2.81%  | 2 P:z     | -7.116  | 1.33 | 12 S |
|       |      |      | 2.76%  | 2 P:z     | -7.116  | 1.33 | 14 S |
|       |      |      | 2.76%  | 2 P:z     | -7.116  | 1.33 | 13 S |
|       |      |      | 1.31%  | 5 S       | 1.359   | 0.00 | 6 Cr |
|       |      |      | 1.16%  | 1 P:z     | -7.213  | 1.00 | 5 N  |
|       |      |      | 1.04%  | 1 P:z     | -7.213  | 1.00 | 2 N  |
|       |      |      | 1.01%  | 1 P:z     | -7.213  | 1.00 | 3 N  |
|       |      |      | 1.01%  | 1 P:z     | -7.213  | 1.00 | 4 N  |

\*\*\* SPIN 2 \*\*\*

| E (eV) | Occ  | MO   | %      | SFO (first member) | E (eV) | Occ  | Fragment |
|--------|------|------|--------|--------------------|--------|------|----------|
| 0.017  | 1.00 | 71 A | 20.36% | 2 P:z              | -7.116 | 1.33 | 11 S     |
|        |      |      | 17.29% | 2 P:z              | -7.116 | 1.33 | 14 S     |
|        |      |      | 17.27% | 2 P:z              | -7.116 | 1.33 | 13 S     |
|        |      |      | 15.06% | 2 P:z              | -7.116 | 1.33 | 12 S     |
|        |      |      | 6.90%  | 1 P:z              | -7.213 | 1.00 | 5 N      |
|        |      |      | 5.81%  | 1 P:z              | -7.213 | 1.00 | 3 N      |
|        |      |      | 5.81%  | 1 P:z              | -7.213 | 1.00 | 4 N      |
|        |      |      | 5.09%  | 1 P:z              | -7.213 | 1.00 | 2 N      |
| 0.099  | 1.00 | 72 A | 23.55% | 2 P:z              | -7.116 | 1.33 | 14 S     |
|        |      |      | 23.55% | 2 P:z              | -7.116 | 1.33 | 13 S     |
|        |      |      | 10.01% | 2 P:y              | -7.116 | 1.33 | 11 S     |
|        |      |      | 8.53%  | 2 P:y              | -7.116 | 1.33 | 12 S     |
|        |      |      | 8.04%  | 1 P:z              | -7.213 | 1.00 | 3 N      |
|        |      |      | 8.04%  | 1 P:z              | -7.213 | 1.00 | 4 N      |
|        |      |      | 5.54%  | 1 P:y              | -7.213 | 1.00 | 1 N      |



|       |      |      |        |           |         |      |      |
|-------|------|------|--------|-----------|---------|------|------|
|       |      |      | 3.59%  | 1 P:y     | -7.213  | 1.00 | 5 N  |
|       |      |      | 3.04%  | 1 P:y     | -7.213  | 1.00 | 2 N  |
|       |      |      | 1.06%  | 2 P:y     | -7.116  | 1.33 | 14 S |
|       |      |      | 1.05%  | 2 P:y     | -7.116  | 1.33 | 13 S |
| 0.103 | 1.00 | 73 A | 30.19% | 2 P:z     | -7.116  | 1.33 | 12 S |
|       |      |      | 21.86% | 2 P:z     | -7.116  | 1.33 | 11 S |
|       |      |      | 10.47% | 1 P:z     | -7.213  | 1.00 | 2 N  |
|       |      |      | 7.64%  | 1 P:z     | -7.213  | 1.00 | 5 N  |
|       |      |      | 7.04%  | 2 P:x     | -7.116  | 1.33 | 13 S |
|       |      |      | 7.04%  | 2 P:x     | -7.116  | 1.33 | 14 S |
|       |      |      | 5.70%  | 1 P:x     | -7.213  | 1.00 | 1 N  |
|       |      |      | 2.54%  | 1 P:x     | -7.213  | 1.00 | 4 N  |
|       |      |      | 2.54%  | 1 P:x     | -7.213  | 1.00 | 3 N  |
| 0.248 | 1.00 | 74 A | 20.02% | 2 P:y     | -7.116  | 1.33 | 12 S |
|       |      |      | 17.74% | 2 P:x     | -7.116  | 1.33 | 14 S |
|       |      |      | 17.73% | 2 P:x     | -7.116  | 1.33 | 13 S |
|       |      |      | 15.93% | 2 P:y     | -7.116  | 1.33 | 11 S |
|       |      |      | 7.37%  | 1 P:y     | -7.213  | 1.00 | 2 N  |
|       |      |      | 6.56%  | 1 P:x     | -7.213  | 1.00 | 3 N  |
|       |      |      | 6.55%  | 1 P:x     | -7.213  | 1.00 | 4 N  |
|       |      |      | 5.89%  | 1 P:y     | -7.213  | 1.00 | 5 N  |
| 2.199 | 0.00 | 75 A | 68.58% | 1 D:xy    | -2.737  | 1.00 | 6 Cr |
|       |      |      | 3.95%  | 2 P:y     | -7.116  | 1.33 | 11 S |
|       |      |      | 3.93%  | 2 P:x     | -7.116  | 1.33 | 13 S |
|       |      |      | 3.93%  | 2 P:x     | -7.116  | 1.33 | 14 S |
|       |      |      | 3.90%  | 2 P:y     | -7.116  | 1.33 | 12 S |
|       |      |      | 3.22%  | 1 P:y     | -5.392  | 0.67 | 8 C  |
|       |      |      | 3.19%  | 1 P:x     | -5.392  | 0.67 | 9 C  |
|       |      |      | 3.19%  | 1 P:x     | -5.392  | 0.67 | 10 C |
|       |      |      | 3.15%  | 1 P:y     | -5.392  | 0.67 | 7 C  |
|       |      |      | 1.11%  | 2 D:xy    | 11.078  | 0.00 | 6 Cr |
| 3.768 | 0.00 | 76 A | 47.49% | 1 D:xz    | -2.737  | 1.00 | 6 Cr |
|       |      |      | 37.55% | 1 P:x     | -7.213  | 1.00 | 1 N  |
|       |      |      | 2.95%  | 2 D:xz    | 11.078  | 0.00 | 6 Cr |
|       |      |      | 2.45%  | 1 P:z     | -5.392  | 0.67 | 7 C  |
|       |      |      | 2.42%  | 1 P:z     | -5.392  | 0.67 | 8 C  |
|       |      |      | 1.28%  | 2 P:z     | -7.116  | 1.33 | 12 S |
|       |      |      | 1.22%  | 2 P:z     | -7.116  | 1.33 | 11 S |
|       |      |      | 1.12%  | 2 S       | -18.690 | 2.00 | 2 N  |
| 3.771 | 0.00 | 77 A | 47.09% | 1 D:yz    | -2.737  | 1.00 | 6 Cr |
|       |      |      | 37.41% | 1 P:y     | -7.213  | 1.00 | 1 N  |
|       |      |      | 2.97%  | 2 D:yz    | 11.078  | 0.00 | 6 Cr |
|       |      |      | 2.73%  | 1 P:z     | -5.392  | 0.67 | 9 C  |
|       |      |      | 2.72%  | 1 P:z     | -5.392  | 0.67 | 10 C |
|       |      |      | 1.44%  | 2 P:z     | -7.116  | 1.33 | 13 S |
|       |      |      | 1.44%  | 2 P:z     | -7.116  | 1.33 | 14 S |
| 3.898 | 0.00 | 78 A | 61.38% | 1 D:x2-y2 | -2.737  | 1.00 | 6 Cr |
|       |      |      | 7.48%  | 2 D:x2-y2 | 11.078  | 0.00 | 6 Cr |
|       |      |      | 3.14%  | 2 S       | -18.690 | 2.00 | 5 N  |
|       |      |      | 2.85%  | 2 S       | -18.690 | 2.00 | 2 N  |
|       |      |      | 2.80%  | 2 S       | -18.690 | 2.00 | 3 N  |
|       |      |      | 2.80%  | 2 S       | -18.690 | 2.00 | 4 N  |
|       |      |      | 1.98%  | 1 P:x     | -7.213  | 1.00 | 5 N  |
|       |      |      | 1.76%  | 1 P:x     | -7.213  | 1.00 | 2 N  |
|       |      |      | 1.62%  | 1 P:y     | -7.213  | 1.00 | 3 N  |
|       |      |      | 1.62%  | 1 P:y     | -7.213  | 1.00 | 4 N  |
|       |      |      | 1.24%  | 1 P:z     | -5.392  | 0.67 | 8 C  |
|       |      |      | 1.11%  | 1 P:z     | -5.392  | 0.67 | 7 C  |
|       |      |      | 1.06%  | 2 P:x     | -7.116  | 1.33 | 11 S |
|       |      |      | 1.03%  | 2 S       | -13.865 | 2.00 | 8 C  |
| 4.042 | 0.00 | 79 A | 18.76% | 1 D:z2    | -2.737  | 1.00 | 6 Cr |
|       |      |      | 17.77% | 1 P:z     | -7.213  | 1.00 | 1 N  |
|       |      |      | 10.28% | 3 P:z     | -0.116  | 0.00 | 6 Cr |
|       |      |      | 6.92%  | 1 P:z     | -5.392  | 0.67 | 10 C |
|       |      |      | 6.91%  | 1 P:z     | -5.392  | 0.67 | 9 C  |
|       |      |      | 6.73%  | 1 P:z     | -5.392  | 0.67 | 8 C  |
|       |      |      | 6.22%  | 1 P:z     | -5.392  | 0.67 | 7 C  |
|       |      |      | 3.10%  | 2 P:z     | -7.116  | 1.33 | 11 S |
|       |      |      | 3.03%  | 2 P:z     | -7.116  | 1.33 | 14 S |
|       |      |      | 3.02%  | 2 P:z     | -7.116  | 1.33 | 13 S |

---

|        |       |        |      |      |
|--------|-------|--------|------|------|
| 2.89%  | 2 P:z | -7.116 | 1.33 | 12 S |
| 1.49%  | 1 P:z | -7.213 | 1.00 | 5 N  |
| 1.37%  | 1 P:z | -7.213 | 1.00 | 3 N  |
| 1.36%  | 1 P:z | -7.213 | 1.00 | 4 N  |
| 1.35%  | 1 P:z | -7.213 | 1.00 | 2 N  |
| 1.16%  | 5 S   | 1.359  | 0.00 | 6 Cr |
| -1.14% | 2 P:z | 4.718  | 0.00 | 10 C |
| -1.14% | 2 P:z | 4.718  | 0.00 | 9 C  |
| -1.07% | 2 P:z | 4.718  | 0.00 | 8 C  |

---

**Input:**

```
title [Cr(N)(N3)4]2- all electron geometry opt
```

```
atoms cartesian
```

```
N      0.793818    2.905285   -2.822880
N      0.744027    1.878388   -2.256966
N      0.740525    0.796905   -1.744057
N     -1.816693    0.173258   -0.934761
N     -2.952892    0.167444   -0.555727
N     -4.090984    0.156964   -0.275505
Cr     -0.013374    0.079765    0.001723
N      1.707481   -0.970004    0.158202
N      4.021059   -0.529214    0.402521
N      2.868367   -0.701821    0.274030
N      0.070678    1.265885    0.976984
N     -0.848507   -1.426879    1.092559
N     -0.668715   -1.773682    2.225242
N     -0.556462   -2.163985    3.325076
```

```
end
```

```
charge -2 1
```

```
unrestricted
```

```
symmetry NOSYM
```

```
xc
```

```
  LDA vwn
```

```
  GGA becke perdew
```

```
end
```

```
Geometry
```

```
  Converge Rad=5e-3 E=5e-4
```

```
End
```

```
Integration 6.0
```

```
SCF
```

```
  Mixing 0.1
```

```
  DIIS
```

```
  ITERATIONS 200
```

```
END
```

```
noprint Computation
```

```
noprint Scf
```

```
print OrbPop
```

```
EPRINT
```

```
SFO NOEIG, NOOVL
```

```
ORBPOPER -10 1
```

```
SUBEND
```

```
END
```

```
Fragments
```

```
Cr t21.Cr
```

```
N t21.N
```

```
End
```

```
end input
```

**Output (partial):**

Coordinates (Cartesian)

=====

| Atom | bohr      |           |           | angstrom  |           |           | Geometric Variables   |    |    |
|------|-----------|-----------|-----------|-----------|-----------|-----------|-----------------------|----|----|
|      | X         | Y         | Z         | X         | Y         | Z         | (0:frozen, *:LT par.) |    |    |
| 1 N  | 1.468281  | 5.469642  | -5.339910 | 0.776981  | 2.894409  | -2.825758 | 1                     | 2  | 3  |
| 2 N  | 1.399467  | 3.529564  | -4.271830 | 0.740566  | 1.867764  | -2.260555 | 4                     | 5  | 6  |
| 3 N  | 1.417857  | 1.489262  | -3.298814 | 0.750298  | 0.788083  | -1.745657 | 7                     | 8  | 9  |
| 4 N  | -3.424369 | 0.326047  | -1.764245 | -1.812098 | 0.172537  | -0.933598 | 10                    | 11 | 12 |
| 5 N  | -5.574084 | 0.333364  | -1.055382 | -2.949677 | 0.176408  | -0.558484 | 13                    | 14 | 15 |
| 6 N  | -7.724045 | 0.334159  | -0.520574 | -4.087387 | 0.176829  | -0.275476 | 16                    | 17 | 18 |
| 7 Cr | -0.022627 | 0.149979  | 0.009815  | -0.011974 | 0.079366  | 0.005194  | 19                    | 20 | 21 |
| 8 N  | 3.231522  | -1.833763 | 0.317142  | 1.710047  | -0.970385 | 0.167824  | 22                    | 23 | 24 |
| 9 N  | 7.600505  | -0.962570 | 0.744942  | 4.022013  | -0.509370 | 0.394206  | 25                    | 26 | 27 |
| 10 N | 5.423523  | -1.313324 | 0.519929  | 2.870004  | -0.694981 | 0.275135  | 28                    | 29 | 30 |
| 11 N | 0.139111  | 2.395266  | 1.851861  | 0.073615  | 1.267520  | 0.979963  | 31                    | 32 | 33 |
| 12 N | -1.601454 | -2.696595 | 2.064587  | -0.847453 | -1.426976 | 1.092532  | 34                    | 35 | 36 |
| 13 N | -1.272618 | -3.366664 | 4.200160  | -0.673440 | -1.781561 | 2.222628  | 37                    | 38 | 39 |
| 14 N | -1.071380 | -4.120085 | 6.272201  | -0.566950 | -2.180254 | 3.319105  | 40                    | 41 | 42 |

=====

M U L L I K E N P O P U L A T I O N S

=====

The survey below gives for each atom:

a) the total charge (Z minus electrons)

b) the net spin polarization (nr of electrons spin-A minus spin-B)

c) for each spin the atomic electron valence density (integrated) per L-value.

| Atom | Charge  | Spin density | S                      | P                | D                | F                |
|------|---------|--------------|------------------------|------------------|------------------|------------------|
| ---- | -----   | -----        | -----                  | -----            | -----            | -----            |
| 1 N  | -0.3831 | 0.0323       | A: 1.8419<br>B: 1.8408 | 1.8291<br>1.7978 | 0.0335<br>0.0336 | 0.0032<br>0.0032 |
| 2 N  | 0.1777  | 0.0042       | A: 1.6190<br>B: 1.6188 | 1.7081<br>1.7052 | 0.0805<br>0.0794 | 0.0056<br>0.0056 |
| 3 N  | -0.3828 | -0.0126      | A: 1.8242<br>B: 1.8277 | 1.8247<br>1.8360 | 0.0327<br>0.0306 | 0.0034<br>0.0033 |
| 4 N  | -0.3826 | -0.0115      | A: 1.8235<br>B: 1.8264 | 1.8262<br>1.8368 | 0.0324<br>0.0305 | 0.0034<br>0.0033 |
| 5 N  | 0.1755  | 0.0042       | A: 1.6205<br>B: 1.6200 | 1.7082<br>1.7051 | 0.0801<br>0.0795 | 0.0056<br>0.0056 |
| 6 N  | -0.3776 | 0.0185       | A: 1.8426<br>B: 1.8420 | 1.8188<br>1.8007 | 0.0335<br>0.0336 | 0.0032<br>0.0032 |
| 7 Cr | 0.7025  | 1.1825       | A: 3.1133<br>B: 3.0903 | 6.2526<br>6.2245 | 2.8528<br>1.7207 | 0.0213<br>0.0220 |
| 8 N  | -0.3814 | -0.0130      | A: 1.8223<br>B: 1.8256 | 1.8259<br>1.8378 | 0.0326<br>0.0305 | 0.0034<br>0.0033 |
| 9 N  | -0.3785 | 0.0282       | A: 1.8428<br>B: 1.8419 | 1.8239<br>1.7964 | 0.0335<br>0.0336 | 0.0032<br>0.0032 |
| 10 N | 0.1759  | 0.0044       | A: 1.6204<br>B: 1.6200 | 1.7080<br>1.7050 | 0.0802<br>0.0793 | 0.0056<br>0.0056 |
| 11 N | -0.3628 | -0.2557      | A: 1.9211<br>B: 1.9263 | 1.6124<br>1.8655 | 0.0176<br>0.0154 | 0.0025<br>0.0021 |
| 12 N | -0.3841 | -0.0116      | A: 1.8244<br>B: 1.8274 | 1.8257<br>1.8364 | 0.0328<br>0.0308 | 0.0034<br>0.0033 |
| 13 N | 0.1795  | 0.0042       | A: 1.6191<br>B: 1.6187 | 1.7073<br>1.7044 | 0.0803<br>0.0794 | 0.0056<br>0.0056 |
| 14 N | -0.3782 | 0.0260       | A: 1.8422<br>B: 1.8414 | 1.8232<br>1.7978 | 0.0336<br>0.0337 | 0.0032<br>0.0032 |

\*\*\* SPIN 1 \*\*\*

| E (eV) | Occ  | MO   | %      | SFO (first member)                 | E (eV)  | Occ  | Fragment |
|--------|------|------|--------|------------------------------------|---------|------|----------|
| 1.248  | 1.00 | 58 A | 18.82% | 1 P:z                              | -7.213  | 1.00 | 7 N      |
|        |      |      | 18.16% | 1 P:z                              | -7.213  | 1.00 | 8 N      |
|        |      |      | 10.97% | 1 P:x                              | -7.213  | 1.00 | 3 N      |
|        |      |      | 10.77% | 1 P:x                              | -7.213  | 1.00 | 1 N      |
|        |      |      | 9.74%  | 1 P:x                              | -7.213  | 1.00 | 11 N     |
|        |      |      | 8.53%  | 1 P:x                              | -7.213  | 1.00 | 13 N     |
|        |      |      | 2.76%  | 1 P:z                              | -7.213  | 1.00 | 4 N      |
|        |      |      | 2.52%  | 1 P:y                              | -7.213  | 1.00 | 7 N      |
|        |      |      | 2.21%  | 1 P:y                              | -7.213  | 1.00 | 8 N      |
|        |      |      | 2.08%  | 1 P:y                              | -7.213  | 1.00 | 4 N      |
|        |      |      | 2.07%  | 1 P:z                              | -7.213  | 1.00 | 6 N      |
|        |      |      | 1.80%  | 1 P:y                              | -7.213  | 1.00 | 6 N      |
|        |      |      | 1.32%  | 1 D:xz                             | 33.695  | 0.00 | 9 N      |
|        |      |      | 1.10%  | 1 P:z                              | -7.213  | 1.00 | 3 N      |
| 2.113  | 1.00 | 59 A | 20.96% | 1 D:xz                             | -2.737  | 1.00 | 14 Cr    |
|        |      |      | 13.20% | 1 D:x <sup>2</sup> -y <sup>2</sup> | -2.737  | 1.00 | 14 Cr    |
|        |      |      | 11.40% | 1 D:xy                             | -2.737  | 1.00 | 14 Cr    |
|        |      |      | 6.50%  | 1 D:yz                             | -2.737  | 1.00 | 14 Cr    |
|        |      |      | 6.13%  | 1 P:x                              | -7.213  | 1.00 | 1 N      |
|        |      |      | 5.44%  | 1 D:z <sup>2</sup>                 | -2.737  | 1.00 | 14 Cr    |
|        |      |      | 4.73%  | 1 P:z                              | -7.213  | 1.00 | 8 N      |
|        |      |      | 4.42%  | 1 P:x                              | -7.213  | 1.00 | 3 N      |
|        |      |      | 4.36%  | 1 P:x                              | -7.213  | 1.00 | 13 N     |
|        |      |      | 3.37%  | 1 P:x                              | -7.213  | 1.00 | 11 N     |
|        |      |      | 2.92%  | 1 P:y                              | -7.213  | 1.00 | 6 N      |
|        |      |      | 2.90%  | 1 P:z                              | -7.213  | 1.00 | 7 N      |
|        |      |      | 1.81%  | 1 P:y                              | -7.213  | 1.00 | 4 N      |
|        |      |      | 1.24%  | 2 D:xz                             | 11.078  | 0.00 | 14 Cr    |
| 4.133  | 0.00 | 60 A | 13.64% | 1 D:xz                             | -2.737  | 1.00 | 14 Cr    |
|        |      |      | 11.99% | 1 D:x <sup>2</sup> -y <sup>2</sup> | -2.737  | 1.00 | 14 Cr    |
|        |      |      | 11.17% | 1 D:xy                             | -2.737  | 1.00 | 14 Cr    |
|        |      |      | 7.69%  | 1 D:z <sup>2</sup>                 | -2.737  | 1.00 | 14 Cr    |
|        |      |      | 6.78%  | 1 P:y                              | -7.213  | 1.00 | 8 N      |
|        |      |      | 6.47%  | 1 P:z                              | -7.213  | 1.00 | 6 N      |
|        |      |      | 4.47%  | 1 D:yz                             | -2.737  | 1.00 | 14 Cr    |
|        |      |      | 2.92%  | 1 P:y                              | -7.213  | 1.00 | 13 N     |
|        |      |      | 2.89%  | 1 P:z                              | -7.213  | 1.00 | 1 N      |
|        |      |      | 2.70%  | 1 P:x                              | -7.213  | 1.00 | 13 N     |
|        |      |      | 2.68%  | 1 P:y                              | -7.213  | 1.00 | 9 N      |
|        |      |      | 2.48%  | 1 P:z                              | -7.213  | 1.00 | 5 N      |
|        |      |      | 1.64%  | 1 P:y                              | -7.213  | 1.00 | 1 N      |
|        |      |      | 1.47%  | 2 S                                | -18.690 | 2.00 | 4 N      |
|        |      |      | 1.43%  | 2 S                                | -18.690 | 2.00 | 7 N      |
|        |      |      | 1.42%  | 2 D:xz                             | 11.078  | 0.00 | 14 Cr    |
|        |      |      | 1.40%  | 1 P:x                              | -7.213  | 1.00 | 1 N      |
|        |      |      | 1.40%  | 2 S                                | -18.690 | 2.00 | 3 N      |
|        |      |      | 1.38%  | 2 S                                | -18.690 | 2.00 | 11 N     |
|        |      |      | 1.31%  | 1 P:z                              | -7.213  | 1.00 | 2 N      |
|        |      |      | 1.28%  | 1 P:y                              | -7.213  | 1.00 | 12 N     |
|        |      |      | 1.12%  | 2 D:xy                             | 11.078  | 0.00 | 14 Cr    |
|        |      |      | 1.04%  | 2 D:x <sup>2</sup> -y <sup>2</sup> | 11.078  | 0.00 | 14 Cr    |
|        |      |      | 1.03%  | 1 P:x                              | -7.213  | 1.00 | 12 N     |
| 4.668  | 0.00 | 61 A | 25.20% | 1 D:z <sup>2</sup>                 | -2.737  | 1.00 | 14 Cr    |
|        |      |      | 21.11% | 1 P:z                              | -7.213  | 1.00 | 10 N     |
|        |      |      | 12.67% | 1 P:y                              | -7.213  | 1.00 | 10 N     |
|        |      |      | 10.20% | 1 P:x                              | -7.213  | 1.00 | 10 N     |
|        |      |      | 6.96%  | 1 D:xy                             | -2.737  | 1.00 | 14 Cr    |
|        |      |      | 6.34%  | 1 D:x <sup>2</sup> -y <sup>2</sup> | -2.737  | 1.00 | 14 Cr    |
|        |      |      | 3.04%  | 1 D:xz                             | -2.737  | 1.00 | 14 Cr    |
|        |      |      | 2.09%  | 2 D:z <sup>2</sup>                 | 11.078  | 0.00 | 14 Cr    |
|        |      |      | 1.68%  | 1 D:yz                             | -2.737  | 1.00 | 14 Cr    |
|        |      |      | 1.60%  | 1 P:x                              | -7.213  | 1.00 | 13 N     |
| 4.720  | 0.00 | 62 A | 32.24% | 1 P:x                              | -7.213  | 1.00 | 10 N     |

|       |      |      |        |           |         |      |       |
|-------|------|------|--------|-----------|---------|------|-------|
|       |      |      | 18.61% | 1 D:xy    | -2.737  | 1.00 | 14 Cr |
|       |      |      | 13.45% | 1 D:xz    | -2.737  | 1.00 | 14 Cr |
|       |      |      | 6.45%  | 1 D:z2    | -2.737  | 1.00 | 14 Cr |
|       |      |      | 5.34%  | 1 P:y     | -7.213  | 1.00 | 10 N  |
|       |      |      | 5.15%  | 1 P:z     | -7.213  | 1.00 | 10 N  |
|       |      |      | 4.06%  | 1 D:x2-y2 | -2.737  | 1.00 | 14 Cr |
|       |      |      | 1.68%  | 2 D:xy    | 11.078  | 0.00 | 14 Cr |
|       |      |      | 1.44%  | 1 P:z     | -7.213  | 1.00 | 6 N   |
|       |      |      | 1.22%  | 2 D:xz    | 11.078  | 0.00 | 14 Cr |
|       |      |      | 1.21%  | 1 P:y     | -7.213  | 1.00 | 8 N   |
|       |      |      | 1.10%  | 1 P:y     | -7.213  | 1.00 | 6 N   |
|       |      |      | 1.04%  | 2 S       | -18.690 | 2.00 | 7 N   |
| 5.054 | 0.00 | 63 A | 15.64% | 1 D:yz    | -2.737  | 1.00 | 14 Cr |
|       |      |      | 13.01% | 1 P:y     | -7.213  | 1.00 | 10 N  |
|       |      |      | 9.19%  | 1 P:z     | -7.213  | 1.00 | 10 N  |
|       |      |      | 6.15%  | 1 P:y     | -7.213  | 1.00 | 13 N  |
|       |      |      | 5.74%  | 1 P:z     | -7.213  | 1.00 | 1 N   |
|       |      |      | 4.98%  | 1 D:x2-y2 | -2.737  | 1.00 | 14 Cr |
|       |      |      | 4.33%  | 1 P:y     | -7.213  | 1.00 | 8 N   |
|       |      |      | 3.63%  | 1 P:y     | -7.213  | 1.00 | 12 N  |
|       |      |      | 3.45%  | 3 P:y     | -0.116  | 0.00 | 14 Cr |
|       |      |      | 3.44%  | 1 P:z     | -7.213  | 1.00 | 2 N   |
|       |      |      | 3.34%  | 1 P:z     | -7.213  | 1.00 | 6 N   |
|       |      |      | 2.92%  | 5 S       | 1.359   | 0.00 | 14 Cr |
|       |      |      | 2.84%  | 1 P:y     | -7.213  | 1.00 | 6 N   |
|       |      |      | 2.46%  | 1 P:y     | -7.213  | 1.00 | 9 N   |
|       |      |      | 2.40%  | 3 P:z     | -0.116  | 0.00 | 14 Cr |
|       |      |      | 1.96%  | 1 P:z     | -7.213  | 1.00 | 8 N   |
|       |      |      | 1.87%  | 1 P:z     | -7.213  | 1.00 | 5 N   |
|       |      |      | 1.66%  | 1 P:y     | -7.213  | 1.00 | 1 N   |
|       |      |      | 1.66%  | 1 P:y     | -7.213  | 1.00 | 5 N   |
|       |      |      | 1.15%  | 1 P:z     | -7.213  | 1.00 | 9 N   |
| 6.362 | 0.00 | 64 A | 50.56% | 5 S       | 1.359   | 0.00 | 14 Cr |
|       |      |      | 20.27% | 4 S       | -3.903  | 1.00 | 14 Cr |
|       |      |      | 2.78%  | 1 P:x     | -7.213  | 1.00 | 13 N  |
|       |      |      | 2.70%  | 1 P:y     | -7.213  | 1.00 | 6 N   |
|       |      |      | 2.67%  | 1 P:x     | -7.213  | 1.00 | 12 N  |
|       |      |      | 2.55%  | 1 P:y     | -7.213  | 1.00 | 5 N   |
|       |      |      | 2.31%  | 1 P:y     | -7.213  | 1.00 | 10 N  |
|       |      |      | 1.88%  | 1 P:z     | -7.213  | 1.00 | 8 N   |
|       |      |      | 1.88%  | 1 P:z     | -7.213  | 1.00 | 5 N   |
|       |      |      | 1.73%  | 1 P:y     | -7.213  | 1.00 | 4 N   |
|       |      |      | 1.71%  | 1 P:x     | -7.213  | 1.00 | 11 N  |
|       |      |      | 1.64%  | 1 P:z     | -7.213  | 1.00 | 9 N   |
|       |      |      | 1.62%  | 1 P:z     | -7.213  | 1.00 | 6 N   |
|       |      |      | 1.51%  | 1 P:y     | -7.213  | 1.00 | 9 N   |
|       |      |      | 1.46%  | 1 P:y     | -7.213  | 1.00 | 8 N   |
|       |      |      | -1.43% | 3 S       | 14.025  | 0.00 | 6 N   |
|       |      |      | 1.41%  | 1 P:x     | -7.213  | 1.00 | 1 N   |
|       |      |      | 1.40%  | 1 P:z     | -7.213  | 1.00 | 10 N  |
|       |      |      | 1.32%  | 1 P:z     | -7.213  | 1.00 | 7 N   |
|       |      |      | -1.27% | 3 S       | 14.025  | 0.00 | 8 N   |
|       |      |      | 1.23%  | 1 P:x     | -7.213  | 1.00 | 2 N   |
|       |      |      | -1.23% | 3 S       | 14.025  | 0.00 | 13 N  |
|       |      |      | -1.17% | 3 S       | 14.025  | 0.00 | 1 N   |
|       |      |      | 1.01%  | 3 S       | 14.025  | 0.00 | 10 N  |

\*\*\* SPIN 2 \*\*\*

| E (eV) | Occ  | MO   | %      | SFO (first member) | E (eV) | Occ  | Fragment |
|--------|------|------|--------|--------------------|--------|------|----------|
| .      |      |      |        |                    |        |      |          |
| .      |      |      |        |                    |        |      |          |
| .      |      |      |        |                    |        |      |          |
| 1.302  | 1.00 | 58 A | 15.96% | 1 P:z              | -7.213 | 1.00 | 7 N      |
|        |      |      | 15.11% | 1 P:z              | -7.213 | 1.00 | 8 N      |
|        |      |      | 13.15% | 1 P:x              | -7.213 | 1.00 | 3 N      |

|       |      |      |        |           |         |      |       |
|-------|------|------|--------|-----------|---------|------|-------|
|       |      |      | 12.65% | 1 P:x     | -7.213  | 1.00 | 1 N   |
|       |      |      | 10.48% | 1 P:x     | -7.213  | 1.00 | 11 N  |
|       |      |      | 9.15%  | 1 P:x     | -7.213  | 1.00 | 13 N  |
|       |      |      | 2.80%  | 1 P:y     | -7.213  | 1.00 | 7 N   |
|       |      |      | 2.67%  | 1 P:z     | -7.213  | 1.00 | 4 N   |
|       |      |      | 2.44%  | 1 P:y     | -7.213  | 1.00 | 8 N   |
|       |      |      | 2.08%  | 1 P:y     | -7.213  | 1.00 | 4 N   |
|       |      |      | 2.02%  | 1 P:z     | -7.213  | 1.00 | 6 N   |
|       |      |      | 1.78%  | 1 P:y     | -7.213  | 1.00 | 6 N   |
|       |      |      | 1.13%  | 1 P:z     | -7.213  | 1.00 | 3 N   |
|       |      |      | 1.11%  | 1 D:xz    | 33.695  | 0.00 | 9 N   |
| 3.773 | 0.00 | 59 A | 22.71% | 1 D:x2-y2 | -2.737  | 1.00 | 14 Cr |
|       |      |      | 21.64% | 1 D:xz    | -2.737  | 1.00 | 14 Cr |
|       |      |      | 11.07% | 1 D:xy    | -2.737  | 1.00 | 14 Cr |
|       |      |      | 10.88% | 1 D:yz    | -2.737  | 1.00 | 14 Cr |
|       |      |      | 9.76%  | 1 D:z2    | -2.737  | 1.00 | 14 Cr |
|       |      |      | 4.16%  | 1 P:x     | -7.213  | 1.00 | 1 N   |
|       |      |      | 3.34%  | 1 P:x     | -7.213  | 1.00 | 13 N  |
|       |      |      | 3.04%  | 1 P:z     | -7.213  | 1.00 | 8 N   |
|       |      |      | 1.64%  | 1 P:y     | -7.213  | 1.00 | 6 N   |
|       |      |      | 1.23%  | 1 P:z     | -7.213  | 1.00 | 6 N   |
|       |      |      | 1.21%  | 1 P:x     | -7.213  | 1.00 | 2 N   |
| 4.443 | 0.00 | 60 A | 19.67% | 1 D:xz    | -2.737  | 1.00 | 14 Cr |
|       |      |      | 14.95% | 1 D:xy    | -2.737  | 1.00 | 14 Cr |
|       |      |      | 7.97%  | 1 D:x2-y2 | -2.737  | 1.00 | 14 Cr |
|       |      |      | 6.31%  | 1 P:y     | -7.213  | 1.00 | 8 N   |
|       |      |      | 5.88%  | 1 P:z     | -7.213  | 1.00 | 6 N   |
|       |      |      | 5.53%  | 1 D:z2    | -2.737  | 1.00 | 14 Cr |
|       |      |      | 3.20%  | 1 P:y     | -7.213  | 1.00 | 13 N  |
|       |      |      | 3.10%  | 1 P:z     | -7.213  | 1.00 | 1 N   |
|       |      |      | 2.92%  | 1 P:y     | -7.213  | 1.00 | 9 N   |
|       |      |      | 2.66%  | 1 D:yz    | -2.737  | 1.00 | 14 Cr |
|       |      |      | 2.63%  | 1 P:z     | -7.213  | 1.00 | 5 N   |
|       |      |      | 1.97%  | 1 P:x     | -7.213  | 1.00 | 13 N  |
|       |      |      | 1.72%  | 1 P:y     | -7.213  | 1.00 | 1 N   |
|       |      |      | 1.66%  | 1 P:y     | -7.213  | 1.00 | 12 N  |
|       |      |      | 1.66%  | 1 P:z     | -7.213  | 1.00 | 2 N   |
|       |      |      | 1.48%  | 2 S       | -18.690 | 2.00 | 4 N   |
|       |      |      | 1.44%  | 2 D:xz    | 11.078  | 0.00 | 14 Cr |
|       |      |      | 1.41%  | 2 S       | -18.690 | 2.00 | 7 N   |
|       |      |      | 1.40%  | 2 S       | -18.690 | 2.00 | 3 N   |
|       |      |      | 1.38%  | 2 S       | -18.690 | 2.00 | 11 N  |
|       |      |      | 1.11%  | 2 D:xy    | 11.078  | 0.00 | 14 Cr |
| 5.012 | 0.00 | 61 A | 28.10% | 1 D:z2    | -2.737  | 1.00 | 14 Cr |
|       |      |      | 15.35% | 1 P:z     | -7.213  | 1.00 | 10 N  |
|       |      |      | 10.44% | 1 D:xy    | -2.737  | 1.00 | 14 Cr |
|       |      |      | 10.23% | 1 P:x     | -7.213  | 1.00 | 10 N  |
|       |      |      | 9.00%  | 1 P:y     | -7.213  | 1.00 | 10 N  |
|       |      |      | 6.61%  | 1 D:x2-y2 | -2.737  | 1.00 | 14 Cr |
|       |      |      | 4.61%  | 1 D:xz    | -2.737  | 1.00 | 14 Cr |
|       |      |      | 1.93%  | 1 P:x     | -7.213  | 1.00 | 13 N  |
|       |      |      | 1.90%  | 1 D:yz    | -2.737  | 1.00 | 14 Cr |
|       |      |      | 1.55%  | 2 D:z2    | 11.078  | 0.00 | 14 Cr |
|       |      |      | 1.18%  | 1 P:x     | -7.213  | 1.00 | 1 N   |
|       |      |      | 1.07%  | 1 P:x     | -7.213  | 1.00 | 12 N  |
| 5.060 | 0.00 | 62 A | 23.02% | 1 P:x     | -7.213  | 1.00 | 10 N  |
|       |      |      | 19.75% | 1 D:xy    | -2.737  | 1.00 | 14 Cr |
|       |      |      | 14.76% | 1 D:xz    | -2.737  | 1.00 | 14 Cr |
|       |      |      | 10.10% | 1 D:z2    | -2.737  | 1.00 | 14 Cr |
|       |      |      | 5.74%  | 1 P:y     | -7.213  | 1.00 | 10 N  |
|       |      |      | 5.32%  | 1 D:x2-y2 | -2.737  | 1.00 | 14 Cr |
|       |      |      | 4.99%  | 1 P:z     | -7.213  | 1.00 | 10 N  |
|       |      |      | 1.82%  | 1 P:y     | -7.213  | 1.00 | 6 N   |
|       |      |      | 1.32%  | 1 P:y     | -7.213  | 1.00 | 8 N   |
|       |      |      | 1.30%  | 1 P:z     | -7.213  | 1.00 | 6 N   |
|       |      |      | 1.22%  | 2 D:xy    | 11.078  | 0.00 | 14 Cr |
|       |      |      | 1.15%  | 1 P:y     | -7.213  | 1.00 | 5 N   |
|       |      |      | 1.04%  | 2 S       | -18.690 | 2.00 | 7 N   |
| 5.221 | 0.00 | 63 A | 15.37% | 1 D:yz    | -2.737  | 1.00 | 14 Cr |
|       |      |      | 9.32%  | 1 P:y     | -7.213  | 1.00 | 10 N  |

---

|       |      |      |        |                                    |        |      |       |
|-------|------|------|--------|------------------------------------|--------|------|-------|
|       |      |      | 7.40%  | 1 P:z                              | -7.213 | 1.00 | 10 N  |
|       |      |      | 6.62%  | 1 P:y                              | -7.213 | 1.00 | 13 N  |
|       |      |      | 6.19%  | 1 P:z                              | -7.213 | 1.00 | 1 N   |
|       |      |      | 5.31%  | 1 D:x <sup>2</sup> -y <sup>2</sup> | -2.737 | 1.00 | 14 Cr |
|       |      |      | 4.40%  | 1 P:y                              | -7.213 | 1.00 | 8 N   |
|       |      |      | 4.14%  | 1 P:y                              | -7.213 | 1.00 | 12 N  |
|       |      |      | 3.94%  | 1 P:z                              | -7.213 | 1.00 | 2 N   |
|       |      |      | 3.86%  | 3 P:y                              | -0.116 | 0.00 | 14 Cr |
|       |      |      | 3.63%  | 1 P:z                              | -7.213 | 1.00 | 6 N   |
|       |      |      | 3.36%  | 5 S                                | 1.359  | 0.00 | 14 Cr |
|       |      |      | 2.97%  | 1 P:y                              | -7.213 | 1.00 | 6 N   |
|       |      |      | 2.70%  | 1 P:y                              | -7.213 | 1.00 | 9 N   |
|       |      |      | 2.68%  | 3 P:z                              | -0.116 | 0.00 | 14 Cr |
|       |      |      | 2.25%  | 1 P:z                              | -7.213 | 1.00 | 8 N   |
|       |      |      | 2.19%  | 1 P:z                              | -7.213 | 1.00 | 5 N   |
|       |      |      | 1.83%  | 1 P:y                              | -7.213 | 1.00 | 5 N   |
|       |      |      | 1.73%  | 1 P:y                              | -7.213 | 1.00 | 1 N   |
|       |      |      | 1.39%  | 1 P:z                              | -7.213 | 1.00 | 9 N   |
| 6.374 | 0.00 | 64 A | 52.82% | 5 S                                | 1.359  | 0.00 | 14 Cr |
|       |      |      | 21.78% | 4 S                                | -3.903 | 1.00 | 14 Cr |
|       |      |      | 2.58%  | 1 P:y                              | -7.213 | 1.00 | 6 N   |
|       |      |      | 2.57%  | 1 P:x                              | -7.213 | 1.00 | 13 N  |
|       |      |      | 2.40%  | 1 P:x                              | -7.213 | 1.00 | 12 N  |
|       |      |      | 2.36%  | 1 P:y                              | -7.213 | 1.00 | 5 N   |
|       |      |      | 2.26%  | 1 P:y                              | -7.213 | 1.00 | 10 N  |
|       |      |      | 1.81%  | 1 P:z                              | -7.213 | 1.00 | 8 N   |
|       |      |      | 1.57%  | 1 P:y                              | -7.213 | 1.00 | 4 N   |
|       |      |      | 1.51%  | 1 P:z                              | -7.213 | 1.00 | 9 N   |
|       |      |      | -1.49% | 3 S                                | 14.025 | 0.00 | 6 N   |
|       |      |      | 1.48%  | 1 P:x                              | -7.213 | 1.00 | 11 N  |
|       |      |      | 1.47%  | 1 P:x                              | -7.213 | 1.00 | 1 N   |
|       |      |      | 1.37%  | 1 P:z                              | -7.213 | 1.00 | 10 N  |
|       |      |      | 1.37%  | 1 P:z                              | -7.213 | 1.00 | 5 N   |
|       |      |      | -1.35% | 3 S                                | 14.025 | 0.00 | 8 N   |
|       |      |      | -1.31% | 3 S                                | 14.025 | 0.00 | 13 N  |
|       |      |      | -1.24% | 3 S                                | 14.025 | 0.00 | 1 N   |
|       |      |      | 1.23%  | 1 P:x                              | -7.213 | 1.00 | 2 N   |
|       |      |      | 1.21%  | 1 P:y                              | -7.213 | 1.00 | 9 N   |
|       |      |      | 1.20%  | 1 P:z                              | -7.213 | 1.00 | 7 N   |
|       |      |      | 1.17%  | 1 P:y                              | -7.213 | 1.00 | 8 N   |
|       |      |      | 1.15%  | 1 P:z                              | -7.213 | 1.00 | 6 N   |
|       |      |      | 1.04%  | 3 S                                | 14.025 | 0.00 | 10 N  |
|       |      |      | 1.01%  | 1 D:yz                             | -2.737 | 1.00 | 14 Cr |

---

**Input:**

title slater TS [Cr(N)(NCS)4]2- optim geometry

atoms cartesian

|    |           |           |           |
|----|-----------|-----------|-----------|
| N  | 0.029195  | -0.000113 | -2.039063 |
| Cr | 0.010605  | -0.000035 | -0.505038 |
| N  | -1.928775 | 0.000222  | -0.076968 |
| N  | -0.000421 | 1.927338  | -0.034794 |
| N  | -0.000903 | -1.927361 | -0.034941 |
| C  | -3.095427 | 0.000253  | 0.121942  |
| N  | 1.938357  | -0.000323 | -0.033779 |
| C  | 3.108445  | -0.000256 | 0.144228  |
| C  | -0.018034 | -3.080381 | 0.231069  |
| C  | -0.017574 | 3.080416  | 0.230929  |
| S  | 4.719341  | -0.000122 | 0.396621  |
| S  | -4.702232 | 0.000260  | 0.402314  |
| S  | -0.039927 | -4.670165 | 0.593301  |
| S  | -0.039596 | 4.670181  | 0.593338  |

end

charge -2 1

unrestricted

symmetry NOSYM

```

BASIS
  TYPE TZ2P
  CORE NONE
END

xc
  LDA vwn
  GGA becke perdew
end

scf
  Mixing 0.1
  Iterations 70
end

occupations
  A 74 0.5 0.5 // 74
end

noprnt Computation
noprnt Scf
prnt OrbPop

EPRINT
SFO NOEIG, NOOVL
ORBPOPER -10 1
SUBEND
END

end input

```

**Output (partial):**

\*\*\* SPIN 1 \*\*\*

| E (eV) | Occ  | MO   | %      | SFO (first member) | E (eV)  | Occ  | Fragment |
|--------|------|------|--------|--------------------|---------|------|----------|
| 0.220  | 1.00 | 74 A | 19.97% | 2 P:y              | -7.116  | 1.33 | 12 S     |
|        |      |      | 17.67% | 2 P:x              | -7.116  | 1.33 | 14 S     |
|        |      |      | 17.66% | 2 P:x              | -7.116  | 1.33 | 13 S     |
|        |      |      | 15.73% | 2 P:y              | -7.116  | 1.33 | 11 S     |
|        |      |      | 7.41%  | 1 P:y              | -7.213  | 1.00 | 2 N      |
|        |      |      | 6.58%  | 1 P:x              | -7.213  | 1.00 | 3 N      |
|        |      |      | 6.58%  | 1 P:x              | -7.213  | 1.00 | 4 N      |
|        |      |      | 5.85%  | 1 P:y              | -7.213  | 1.00 | 5 N      |
| 1.161  | 0.50 | 75 A | 58.76% | 1 D:xy             | -2.737  | 1.00 | 6 Cr     |
|        |      |      | 6.21%  | 2 P:y              | -7.116  | 1.33 | 11 S     |
|        |      |      | 6.17%  | 2 P:y              | -7.116  | 1.33 | 12 S     |
|        |      |      | 6.11%  | 2 P:x              | -7.116  | 1.33 | 13 S     |
|        |      |      | 6.11%  | 2 P:x              | -7.116  | 1.33 | 14 S     |
|        |      |      | 2.35%  | 2 D:xy             | 11.078  | 0.00 | 6 Cr     |
|        |      |      | 1.79%  | 1 P:y              | -5.392  | 0.67 | 8 C      |
|        |      |      | 1.76%  | 1 P:x              | -5.392  | 0.67 | 9 C      |
|        |      |      | 1.76%  | 1 P:x              | -5.392  | 0.67 | 10 C     |
|        |      |      | 1.74%  | 1 P:y              | -5.392  | 0.67 | 7 C      |
|        |      |      | 1.55%  | 1 P:y              | -7.213  | 1.00 | 5 N      |
|        |      |      | 1.54%  | 1 P:y              | -7.213  | 1.00 | 2 N      |
|        |      |      | 1.50%  | 1 P:x              | -7.213  | 1.00 | 4 N      |
|        |      |      | 1.50%  | 1 P:x              | -7.213  | 1.00 | 3 N      |
| 3.434  | 0.50 | 76 A | 60.01% | 1 D:x2-y2          | -2.737  | 1.00 | 6 Cr     |
|        |      |      | 8.82%  | 2 D:x2-y2          | 11.078  | 0.00 | 6 Cr     |
|        |      |      | 3.34%  | 2 S                | -18.690 | 2.00 | 2 N      |



---

|       |      |      |        |        |         |      |      |
|-------|------|------|--------|--------|---------|------|------|
|       |      |      | 3.23%  | 2 S    | -18.690 | 2.00 | 4 N  |
|       |      |      | 3.23%  | 2 S    | -18.690 | 2.00 | 3 N  |
|       |      |      | 3.14%  | 2 S    | -18.690 | 2.00 | 5 N  |
|       |      |      | 2.07%  | 1 P:x  | -7.213  | 1.00 | 2 N  |
|       |      |      | 2.00%  | 1 P:x  | -7.213  | 1.00 | 5 N  |
|       |      |      | 1.95%  | 1 P:y  | -7.213  | 1.00 | 4 N  |
|       |      |      | 1.95%  | 1 P:y  | -7.213  | 1.00 | 3 N  |
| 3.692 | 0.00 | 77 A | 46.31% | 1 P:x  | -7.213  | 1.00 | 1 N  |
|       |      |      | 40.82% | 1 D:xz | -2.737  | 1.00 | 6 Cr |
|       |      |      | 3.53%  | 2 D:xz | 11.078  | 0.00 | 6 Cr |
|       |      |      | 1.68%  | 1 P:z  | -5.392  | 0.67 | 7 C  |
|       |      |      | 1.40%  | 1 P:z  | -5.392  | 0.67 | 8 C  |
|       |      |      | 1.13%  | 2 S    | -18.690 | 2.00 | 5 N  |

**Input:**

```
title [Cr(N)(N3)4]2- all electron geometry opt
```

```
atoms cartesian
```

```

N      0.71084      2.84826      -2.42021
N      0.71331      1.79359      -2.13301
N      0.80632      0.64070      -1.86152
N     -1.81346      0.48332      -0.89352
N     -2.93356      0.19205      -0.55083
N     -3.97135     -0.05927      -0.29851
Cr    -0.01400      0.02734      -0.04769
N      1.60870     -1.14163      0.23795
N      3.80309     -0.46640      0.46684
N      2.74119     -0.72152      0.35943
N      0.18618      1.22563      0.90182
N     -1.03026     -1.33209      1.01055
N     -0.56992     -1.63559      2.13392
N     -0.23706     -1.85439      3.09477
```

```
end
```

```
charge -2 1
```

```
unrestricted
```

```
symmetry NOSYM
```

```
BASIS
```

```
TYPE TZ2P
```

```
CORE NONE
```

```
END
```

```
xc
```

```
LDA vwn
```

```
GGA becke perdew
```

```
end
```

```
scf
```

```
Mixing 0.1
```

```
Iterations 70
```

```
end
```

```
occupations
```

```
A 58 0.5 0.5 // 58
```

```
end
```

```
noprint Computation
```

```
noprint Scf
```

```
print OrbPop
```

```
EPRINT
```

```
SFO NOEIG, NOOVL
```

```
ORBPOPER -10 1
```

```
SUBEND
```

```
END
```

---

 end input
 

---

**Output (partial):**

\*\*\* SPIN 1 \*\*\*

| E (eV) | Occ  | MO   | %      | SFO (first member) | E (eV)  | Occ  | Fragment |
|--------|------|------|--------|--------------------|---------|------|----------|
| .      |      |      |        |                    |         |      |          |
| .      |      |      |        |                    |         |      |          |
| .      |      |      |        |                    |         |      |          |
| 1.863  | 1.00 | 58 A | 21.24% | 1 P:y              | -7.213  | 1.00 | 4 N      |
|        |      |      | 15.67% | 1 P:y              | -7.213  | 1.00 | 6 N      |
|        |      |      | 12.54% | 1 P:z              | -7.213  | 1.00 | 4 N      |
|        |      |      | 9.04%  | 1 P:z              | -7.213  | 1.00 | 6 N      |
|        |      |      | 6.88%  | 1 P:z              | -7.213  | 1.00 | 7 N      |
|        |      |      | 6.24%  | 1 P:x              | -7.213  | 1.00 | 10 N     |
|        |      |      | 5.89%  | 1 P:x              | -7.213  | 1.00 | 3 N      |
|        |      |      | 4.82%  | 1 P:x              | -7.213  | 1.00 | 1 N      |
|        |      |      | 4.81%  | 1 P:z              | -7.213  | 1.00 | 8 N      |
|        |      |      | 1.67%  | 1 P:z              | -7.213  | 1.00 | 3 N      |
|        |      |      | 1.42%  | 1 D:xz             | -2.737  | 1.00 | 14 Cr    |
|        |      |      | 1.37%  | 1 P:z              | -7.213  | 1.00 | 1 N      |
|        |      |      | 1.37%  | 1 P:y              | -7.213  | 1.00 | 10 N     |
|        |      |      | 1.31%  | 1 D:xy             | 33.695  | 0.00 | 5 N      |
| 2.914  | 0.50 | 59 A | 22.28% | 1 D:xz             | -2.737  | 1.00 | 14 Cr    |
|        |      |      | 20.40% | 1 D:x2-y2          | -2.737  | 1.00 | 14 Cr    |
|        |      |      | 11.26% | 1 D:yz             | -2.737  | 1.00 | 14 Cr    |
|        |      |      | 7.27%  | 1 D:z2             | -2.737  | 1.00 | 14 Cr    |
|        |      |      | 6.54%  | 1 D:xy             | -2.737  | 1.00 | 14 Cr    |
|        |      |      | 4.05%  | 1 P:z              | -7.213  | 1.00 | 8 N      |
|        |      |      | 3.84%  | 1 P:x              | -7.213  | 1.00 | 3 N      |
|        |      |      | 3.70%  | 1 P:x              | -7.213  | 1.00 | 1 N      |
|        |      |      | 3.11%  | 1 P:z              | -7.213  | 1.00 | 7 N      |
|        |      |      | 2.35%  | 1 P:x              | -7.213  | 1.00 | 11 N     |
|        |      |      | 1.20%  | 2 D:xz             | 11.078  | 0.00 | 14 Cr    |
|        |      |      | 1.16%  | 1 P:y              | -7.213  | 1.00 | 13 N     |
|        |      |      | 1.08%  | 1 P:x              | -7.213  | 1.00 | 13 N     |
| 4.724  | 0.50 | 60 A | 17.44% | 1 D:xz             | -2.737  | 1.00 | 14 Cr    |
|        |      |      | 10.75% | 1 D:z2             | -2.737  | 1.00 | 14 Cr    |
|        |      |      | 10.18% | 1 D:xy             | -2.737  | 1.00 | 14 Cr    |
|        |      |      | 6.36%  | 1 P:y              | -7.213  | 1.00 | 8 N      |
|        |      |      | 5.52%  | 1 D:x2-y2          | -2.737  | 1.00 | 14 Cr    |
|        |      |      | 4.75%  | 1 P:z              | -7.213  | 1.00 | 1 N      |
|        |      |      | 4.38%  | 1 P:z              | -7.213  | 1.00 | 6 N      |
|        |      |      | 3.18%  | 1 P:y              | -7.213  | 1.00 | 13 N     |
|        |      |      | 2.93%  | 1 P:x              | -7.213  | 1.00 | 13 N     |
|        |      |      | 2.87%  | 1 D:yz             | -2.737  | 1.00 | 14 Cr    |
|        |      |      | 2.70%  | 1 P:y              | -7.213  | 1.00 | 9 N      |
|        |      |      | 1.95%  | 2 D:xz             | 11.078  | 0.00 | 14 Cr    |
|        |      |      | 1.84%  | 1 P:z              | -7.213  | 1.00 | 2 N      |
|        |      |      | 1.62%  | 1 P:z              | -7.213  | 1.00 | 5 N      |
|        |      |      | 1.55%  | 2 S                | -18.690 | 2.00 | 4 N      |
|        |      |      | 1.52%  | 1 P:y              | -7.213  | 1.00 | 12 N     |
|        |      |      | 1.27%  | 1 P:y              | -7.213  | 1.00 | 6 N      |
|        |      |      | 1.25%  | 2 D:z2             | 11.078  | 0.00 | 14 Cr    |
|        |      |      | 1.25%  | 1 P:x              | -7.213  | 1.00 | 12 N     |
|        |      |      | 1.22%  | 1 P:z              | -7.213  | 1.00 | 3 N      |
|        |      |      | 1.21%  | 2 D:xy             | 11.078  | 0.00 | 14 Cr    |
|        |      |      | 1.20%  | 1 P:x              | -7.213  | 1.00 | 1 N      |
|        |      |      | 1.17%  | 1 P:x              | -7.213  | 1.00 | 4 N      |
|        |      |      | 1.14%  | 2 S                | -18.690 | 2.00 | 3 N      |
|        |      |      | 1.11%  | 2 S                | -18.690 | 2.00 | 7 N      |
|        |      |      | 1.01%  | 1 P:x              | -7.213  | 1.00 | 7 N      |

---

|       |      |      |        |           |        |      |       |
|-------|------|------|--------|-----------|--------|------|-------|
| 5.260 | 0.00 | 61 A | 20.88% | 1 P:x     | -7.213 | 1.00 | 10 N  |
|       |      |      | 12.97% | 1 D:z2    | -2.737 | 1.00 | 14 Cr |
|       |      |      | 11.56% | 1 P:y     | -7.213 | 1.00 | 10 N  |
|       |      |      | 11.21% | 1 P:z     | -7.213 | 1.00 | 10 N  |
|       |      |      | 10.07% | 1 D:x2-y2 | -2.737 | 1.00 | 14 Cr |
|       |      |      | 9.84%  | 1 D:xz    | -2.737 | 1.00 | 14 Cr |
|       |      |      | 9.52%  | 1 D:xy    | -2.737 | 1.00 | 14 Cr |
|       |      |      | 1.79%  | 1 P:y     | -7.213 | 1.00 | 6 N   |
|       |      |      | 1.05%  | 2 D:z2    | 11.078 | 0.00 | 14 Cr |

---

## Frequencies calculations

### Input for $[\text{Cr}(\text{N})(\text{NCS})_4]^{2-}$ :

title frequencies[Cr(N)(NCS)4]2- optim geometry

restart t13

atoms cartesian

|    |           |           |           |
|----|-----------|-----------|-----------|
| N  | 0.029195  | -0.000113 | -2.039063 |
| Cr | 0.010605  | -0.000035 | -0.505038 |
| N  | -1.928775 | 0.000222  | -0.076968 |
| N  | -0.000421 | 1.927338  | -0.034794 |
| N  | -0.000903 | -1.927361 | -0.034941 |
| C  | -3.095427 | 0.000253  | 0.121942  |
| N  | 1.938357  | -0.000323 | -0.033779 |
| C  | 3.108445  | -0.000256 | 0.144228  |
| C  | -0.018034 | -3.080381 | 0.231069  |
| C  | -0.017574 | 3.080416  | 0.230929  |
| S  | 4.719341  | -0.000122 | 0.396621  |
| S  | -4.702232 | 0.000260  | 0.402314  |
| S  | -0.039927 | -4.670165 | 0.593301  |
| S  | -0.039596 | 4.670181  | 0.593338  |

end

charge -2 1

unrestricted

symmetry NOSYM

xc

LDA vwn

GGA becke perdew

end

Geometry

Frequencies

End

noprint Computation

noprint Scf

print OrbPop

EPRINT

SFO NOEIG, NOOVL

ORBPOPER -10 1

SUBEND

END

Fragments

Cr t21.Cr

N t21.N

S t21.S

C t21.C

End

end input

**Output** (partial):

Intensities  
=====

| Frequency<br>cm-1 | Dipole Strength<br>1e-40 esu2 cm2 | Absorption Intensity (degeneracy not counted)<br>km/mole |
|-------------------|-----------------------------------|----------------------------------------------------------|
| 11.018420         | 4272383.988034                    | 11799.610543                                             |
| 21.776282         | 941517.979315                     | 5139.139610                                              |
| 22.206375         | 716221.034858                     | 3986.601362                                              |
| 34.696113         | 2167336.329564                    | 18848.864880                                             |
| 38.968629         | 12194437.859237                   | 119111.853944                                            |
| 78.055133         | 55016.316368                      | 1076.393446                                              |
| 78.687341         | 27149.796264                      | 535.487717                                               |
| 96.126368         | 51.317682                         | 1.236482                                                 |
| 129.635267        | 123631.187323                     | 4017.253859                                              |
| 200.599625        | 4120120.187594                    | 207165.805319                                            |
| 210.164660        | 3715151.678824                    | 195710.582776                                            |
| 228.652267        | 82126.101813                      | 4706.898032                                              |
| 229.573237        | 1425098.107687                    | 82005.709784                                             |
| 248.650797        | 1530054.064519                    | 95361.857841                                             |
| 253.815244        | 35150.861945                      | 2236.308692                                              |
| 266.706974        | 721.469468                        | 48.231459                                                |
| 286.877154        | 1117999.794592                    | 80392.541478                                             |
| 393.595975        | 4816.148834                       | 475.147686                                               |
| 395.937453        | 809486.171742                     | 80336.718790                                             |
| 449.036456        | 1023.787007                       | 115.230988                                               |
| 454.146325        | 3486.381928                       | 396.870516                                               |
| 460.264191        | 83952.933426                      | 9685.479669                                              |
| 460.875887        | 343.324323                        | 39.661271                                                |
| 463.197964        | 2704.631661                       | 314.016768                                               |
| 466.989504        | 614.086168                        | 71.881065                                                |
| 468.280103        | 16126.503770                      | 1892.883989                                              |
| 474.901386        | 1074.158488                       | 127.864467                                               |
| 836.724933        | 597427.974532                     | 125298.633628                                            |
| 843.011497        | 35521.938298                      | 7505.994183                                              |
| 843.645377        | 1207930.364012                    | 255434.703144                                            |
| 846.389828        | 614826.099663                     | 130436.999677                                            |
| 1120.655359       | 9508.836617                       | 2671.022385                                              |
| 2081.546458       | 2189.758890                       | 1142.511227                                              |
| 2090.883808       | 412.842721                        | 216.367786                                               |
| 2091.963734       | 6324.310736                       | 3316.235941                                              |
| 2122.459126       | 1610.109172                       | 856.589467                                               |

**Input for [Cr(N)(N<sub>3</sub>)<sub>4</sub>]<sup>2-</sup>:**

title frequencies[Cr(N)(N3)4]2- optim geometry

```
atoms cartesian
N      0.776981   2.894409  -2.825758
N      0.740566   1.867764  -2.260555
N      0.750298   0.788083  -1.745657
N     -1.812098   0.172537  -0.933598
N     -2.949677   0.176408  -0.558484
N     -4.087387   0.176829  -0.275476
Cr     -0.011974   0.079366   0.005194
N      1.710047  -0.970385   0.167824
N      4.022013  -0.509370   0.394206
N      2.870004  -0.694981   0.275135
N      0.073615   1.267520   0.979963
N     -0.847453  -1.426976   1.092532
N     -0.673440  -1.781561   2.222628
N     -0.566950  -2.180254   3.319105
```

end

charge -2 1

```
unrestricted

symmetry NOSYM

xc
  LDA vwn
  GGA becke perdew
end

Geometry
  Frequencies Numdif=2 Disrad=0.007 Disang=0.5

End

Integration 6.0

SCF
  Mixing 0.1
  DIIS
  ITERATIONS 200
END

noprnt Computation
noprnt Scf
prnt OrbPop

EPRINT
SFO NOEIG, NOOVL
ORBPOPER -10 1
SUBEND
END

Fragments
Cr t21.Cr
N t21.N
End
end input
```

**Output (partial):**

```
Intensities
=====
```

| Frequency<br>cm-1 | Dipole Strength<br>1e-40 esu2 cm2 | Absorption Intensity (degeneracy not counted)<br>km/mole |
|-------------------|-----------------------------------|----------------------------------------------------------|
| -13.006497        | 566937.036594                     | -1848.303307                                             |
| 5.885142          | 231366.391925                     | 341.299214                                               |
| 26.058775         | 11437.033696                      | 74.704277                                                |
| 28.763825         | 5914.668433                       | 42.643723                                                |
| 35.800268         | 56170.449760                      | 504.048412                                               |
| 79.128170         | 1742.604643                       | 34.562732                                                |
| 85.464912         | 50440.445650                      | 1080.549913                                              |
| 88.295752         | 2965.765562                       | 65.637903                                                |
| 114.304167        | 11950.535474                      | 342.395066                                               |
| 201.579726        | 6844.212549                       | 345.818648                                               |
| 204.931697        | 1336.704547                       | 68.662978                                                |
| 213.498350        | 807.662496                        | 43.221766                                                |
| 233.858530        | 4435.031237                       | 259.972834                                               |
| 278.449402        | 370.907401                        | 25.887485                                                |
| 283.960196        | 1998.572258                       | 142.251021                                               |
| 289.237287        | 1840.378281                       | 133.425687                                               |
| 352.373211        | 2038.969529                       | 180.090867                                               |
| 390.672135        | 811.177950                        | 79.434039                                                |
| 402.694353        | 702.752293                        | 70.934234                                                |
| 592.534806        | 7101.196755                       | 1054.686732                                              |
| 594.190359        | 37.822010                         | 5.633111                                                 |
| 595.968311        | 31.406540                         | 4.691604                                                 |
| 601.058666        | 508.871516                        | 76.666048                                                |

---

|             |             |             |
|-------------|-------------|-------------|
| 636.957194  | 826.824745  | 132.008465  |
| 639.191521  | 1099.278402 | 176.123282  |
| 640.256522  | 1173.224157 | 188.283853  |
| 642.048022  | 244.970604  | 39.423897   |
| 1113.725289 | 71.515128   | 19.964299   |
| 1345.057730 | 2011.351829 | 678.120759  |
| 1346.524780 | 216.312800  | 73.008704   |
| 1347.612171 | 5632.770192 | 1902.676822 |
| 1351.159886 | 5514.563751 | 1867.652077 |
| 2089.527109 | 2644.865417 | 1385.254782 |
| 2091.776040 | 128.980638  | 67.626634   |
| 2097.335757 | 7691.980835 | 4043.749319 |
| 2126.550317 | 3306.720665 | 1762.589761 |
